# Supplementary material
Source: publisher site journal article supplement (https://www.dovepress.com/article/403837)
Supplement: Supplementary file 1 [file get_supplementary_file.php]

# Appendix 1

**Understanding Eyelid Health – Practitioners’ awareness questionnaire**

We are undertaking this survey so we can form a better understanding of the awareness of eyelid health in current practice. The survey results will be anonymous.

1. Which of the following describes your role?
2. Ophthalmologist
3. Optometrist
4. Other (Please Specify__________)
5. What is your primary place of practice?
6. Hospital
7. Community Practice
8. Academia
9. Other (Please Specify_____________)
10. How long have you been qualified?
    1. Less than 5 years
    2. 5-10 years
    3. 11-20 years
    4. More than 20 years
11. How common do you think blepharitis is in the general population? (%) Please indicate your answer with a vertical line on the scale.

|  |  |  |  |  |  |  |  |  |  |
| --- | --- | --- | --- | --- | --- | --- | --- | --- | --- |
|  |  |  |  |  |  |  |  |  |  |

0 10 20 30 40 50 60 70 80 90 100

1. How common do you think Demodex mites are in the general population? (%) Please indicate your answer with a vertical line on the scale.

|  |  |  |  |  |  |  |  |  |  |
| --- | --- | --- | --- | --- | --- | --- | --- | --- | --- |
|  |  |  |  |  |  |  |  |  |  |

0 10 20 30 40 50 60 70 80 90 100

1. How common do you think Demodex mites are in those with blepharitis? (%) Please indicate your answer with a vertical line on the scale.

|  |  |  |  |  |  |  |  |  |  |
| --- | --- | --- | --- | --- | --- | --- | --- | --- | --- |
|  |  |  |  |  |  |  |  |  |  |

0 10 20 30 40 50 60 70 80 90 100

1. What magnification would you use on a slit lamp to examine the eye lids/lashes?
   1. 6x
   2. 10x
   3. 16x
   4. 25x
   5. 40x
2. Do you think Demodex mites are a significant cause of ocular discomfort?
   1. Strongly agree
   2. Agree
   3. Neutral
   4. Disagree
   5. Strongly Disagree
3. Which sex do you think is more often affected by blepharitis?
   1. Males
   2. Females
   3. Equally affected
4. Have you received any training/CPD on Demodex detection and treatment and how was it delivered?
   1. No training received
   2. Webinar
   3. Article
   4. Lecture
   5. Other (Please specify____________)
5. Do you carry out any specialist dry eye clinics?
   1. Yes
   2. No
6. Do you look for Demodex in your patients?
   1. Yes
   2. No

**FINISH HERE IF THE ANSWER IS “NO” TO QUESTION NUMBER 12**

1. What magnification would you use on a slit lamp to look for Demodex mites?
   1. 6x
   2. 10x
   3. 16x
   4. 25x
   5. 40x
2. Which of the features do you look for in Demodex blepharitis (you can choose multiple answers)?
   1. Cylindrical dandruff on the eyelashes
   2. Crusts/flakes on the eyelashes
   3. Red inflamed eyelids
   4. Dry, irritated eyes
   5. Mite tails
   6. Other (Please specify___________)
3. What is the most common symptom reported by the patients suffering from Demodex blepharitis?
   1. Itching
   2. Crusting on the eyelids
   3. Dryness in the eyes
   4. Other (Please specify___________)
4. How do you confirm the presence of Demodex mites? (you can choose multiple answers)
   1. Epilation
   2. Lash manipulation
   3. Diagnosis by elimination
   4. Presence of cylindrical dandruff
   5. Successful treatment
   6. Other (Please specify___________)
5. What is your primary treatment goal?
   1. Patient comfort
   2. Reduction in the mite population
   3. Elimination of mites
   4. Improving Meibomian gland function
   5. Other (Please specify____________)
6. What is your first choice management option for Demodex mites?
   1. Tea tree oil 50% mix
   2. Tea tree oil wipes/cleanser
   3. Standard lid hygiene
   4. Other (Please specify____________)
7. How long do you recommend for duration of treatment?
   1. 3-4 weeks
   2. 5-8 weeks
   3. 9-12 weeks
   4. > 12 weeks
   5. Other (please specify____________)
8. How often do you recommend the treatment is carried out?
   1. Once a day
   2. Twice a day
   3. Other (Please specify____________)
